# Supplementary material for: Characterization and functional analysis of two novel 3-hydroxy-3-methylglutaryl-coenzyme A reductase genes (GbHMGR2 and GbHMGR3) from Ginkgo biloba
Source: PubMed Central journal article supplement (PMC6773693; doi:10.1038/s41598-019-50629-8), 2019-10-01
Supplement: 41598_2019_50629_MOESM1_ESM.pdf [file 41598_2019_50629_MOESM1_ESM.pdf]

# Characterization and functional analysis of two novel 3-hydroxy-3-methylglutaryl-coenzyme A reductase genes (*GbHMGR2* and *GbHMGR3*) from *Ginkgo biloba*

Shen Rao<sup>1,2a</sup>, Xiangxiang Meng<sup>1a</sup>, Yongling Liao<sup>1,2a</sup>, Tian Yu<sup>2,3</sup>, Jie Cao<sup>1</sup>, Junping Tan<sup>1</sup>, Feng Xu<sup>1,2\*</sup>, Shuiyuan Cheng<sup>2\*</sup>

<sup>1</sup> College of Horticulture and Gardening, Yangtze University, Jingzhou 434025, China

<sup>2</sup> National R&D for Se-rich Agricultural Products Processing Technology, Wuhan Polytechnic University, Wuhan 430023, China

<sup>3</sup> Serun Health Industry Group, Enshi 445000, China

<sup>a</sup> The authors contributed equally to this study

**\*Corresponding authors:** Feng Xu, E-mail: xufeng198@126.com, Tel: +86 716 8066260, Fax: +86 716 8066262; Shuiyuan Cheng, E-mail: s\_y\_cheng@sina.com



-868 ACTATAGGGCACGCGTGGTCGACGGCCCGGGCTGGTATTTGATGGTTATATTTATTTATG  
 -808 AATCATAGCTTTATAAGATTATGATAGATTGATGACTTATAAAGCACAGATTAAGAAAGTG  
 -748 CACTCAAAGTAAAGTACTCATCAACATGCATATAAACTTAAACGATAAAGAAAGTCTA  
 -688 TTTCAAATCGAACCATGCCATGATTCTCTCCA TTAATTGATAGATGTTGAAGCTCTCTC  
**ERE** **TC-rich repeats**  
 -628 TTGTTGAGCTACTAAGGATAAAATTAGTCTAA TGACG ACATGAAAGTTATATTGCTCCTA  
**TGACG-motif**  
 -568 CCACATTTGATATATGCACGAAGCCCTCATTGTTTTATGAAATACATCTTGATATATAC  
 -508 ATTACCTTGTTAGGTCAGCATAATAAATTAAGGCAAGCAATCCACCAATCAACACTTAC  
 -448 TCA CAATCCTC ACTCATGGAT TTTCAA TTATCTTTATGGAAAACATCTC ATCATTTACA  
**ATCC-motif** **Box I** **Box III**  
 -388 CT TTGATCGAAAAGTGCTTAATGAATAATAAAA AAAACATTTA ATGCTAGCCCCAATTA  
**ACE**  
 -328 TGTGACTACATGGTGAATATCA CAAACAACCTCC CTAGAATTAGGCCTTTTAGGAACTAA  
**CAAT-box**  
 -268 TCTTGGTAAACAAGATAACAAACCCTCTTCGTAGCATTATGGTCCCAAAAGCGGA AAC  
**TGA-element**  
 -208 GAC CATATTCTCTTAGGCATCCAACCTCTCGGAACCGCGT GTGCCCTCCTGTTCGA ACA  
**MNF1**  
 -148 CCTGTCAAAGGTAACATTGTTGTTTATTAGTTGGCAGAGTTTATATTAGTAAGTGG  
 -88 TGTCTTTATGTCTAGGCAGAGG GAAAGAA CAGTACGATAGAGACGAGAGCCTGACAAA  
**AAGAA-motif**  
 -28 TATA TGTAGAATAGATCAAGTTATAATC TGGGCGTTGCATGCAGTTCCTCTCTTTTT  
**TATA-box** **+1 Transcription Start**  
 +33 TATTTCTATTTTACTTGAATGCTATTCAGGCTAGATTTGTTCTGTAATCCTGATCATC  
 +93 ATG GCATTGATGAATGCGTGTATGCAACGTGAGAA

Supplementary Fig. S2. Promoter sequence of GbHMGR3. Cis-acting regulatory element, Transcription Start Site and initiation codon were marked with box.

Supplementary **Table S1**. Primers used in this study.

| Primer       | Description                                         | Sequence (5'→3')             |
|--------------|-----------------------------------------------------|------------------------------|
| GbHMGR2-UP   | GbHMGR2 forward primer for cDNA amplification       | CATGAATGGTGTGGGGTGA          |
| GbHMGR2-DN   | GbHMGR2 reverse primer for cDNA amplification       | TCGGTCTCAGGCGGTTGT           |
| GbHMGR3-UP   | GbHMGR3 forward primer for cDNA amplification       | CCTGATCATCATGGCATTG          |
| GbHMGR3-DN   | GbHMGR3 reverse primer for cDNA amplification       | CCATCAGCCTAAGAAAAGCA         |
| GbHMGR2-qd1  | GbHMGR2 primer for promoter 1st round amplification | TCTTCTCCCCTATCTTTGGTTTTCTCA  |
| GbHMGR2-qd2  | GbHMGR2 primer for promoter 2nd round amplification | TCACATTCTCCACCATTCTTTGTCTTC  |
| GbHMGR3-qd1  | GbHMGR3 primer for promoter 1st round amplification | TTCTCACGTTGCATACACGCATTCATC  |
| GbHMGR3-qd2  | GbHMGR3 primer for promoter 2nd round amplification | CTTGTTGGTAAAGGCGACGGGCAGAG   |
| AP1          | Adapter primer, 1st round                           | GTAATACGACTCACTATAGGGC       |
| AP2          | Adapter primer, 2nd round                           | ACTATAGGGCACGCGTGGT          |
| GbHMGR2-gnup | GbHMGR2 forward primer for yeast verification       | CGAGTACTCATGAATGGTGTGGGGTGA  |
| GbHMGR2-gndn | GbHMGR2 reverse primer for yeast verification       | CGTCTAGATCGGTCTCAGGCGGTTGT   |
| GbHMGR3-gnup | GbHMGR3 forward primer for yeast verification       | CGAGTACTCCTGATCATCATGGCATTG  |
| GbHMGR3-gndn | GbHMGR3 reverse primer for yeast verification       | CGTCTAGACCATCAGCCTAAGAAAAGCA |
| GbHMGR2-dIF  | GbHMGR2 forward primer for qRT-PCR                  | GCAATGGGAGTGTGGCTTCTTA       |
| GbHMGR2-dIR  | GbHMGR2 reverse primer for qRT-PCR                  | ATCTGCCGGTCATCAACTCCA        |
| GbHMGR3-dIF  | GbHMGR3 forward primer for qRT-PCR                  | TGATACAGAGGTGGAGGGAGAAGA     |
| GbHMGR3-dIR  | GbHMGR3 reverse primer for qRT-PCR                  | TGAAGGAAGCAAGGAGAATGACC      |
| GAPDH-F      | Reference gene forward primer for qRT-PCR           | GGTGCCAAAAAGGTGGTCAT         |
| GAPDH-R      | Reference gene reverse primer for qRT-PCR           | CAACAACGAACATGGGAGCAT        |
| M13F         | Forward primer for bacterium solution PCR           | TGTAAAACGACGGCCAGT           |
| M13R         | Rorward primer for bacterium solution PCR           | CAGGAAACAGCTATGACC           |
